# Supplementary material for: Vedolizumab Is Associated with Longer Drug Sustainability Compared to Infliximab in Moderate-to-Severe Ulcerative Colitis: Long-Term Real-World Cohort Data
Source: MDPI journal article supplement (doi:10.3390/jcm12134488), 2023-07-04
Supplement: s1 [file s1]

***Supplementary file***

**VEDOLIZUMAB IS ASSOCIATED WITH LONGER DRUG SUSTAINABILITY COMPARED TO INFLIXIMAB IN  
MODERATE-TO-SEVERE ULCERATIVE COLITIS: LONG TERM REAL-WORLD COHORT DATA**

**Table S1.** Baseline characteristics of those treated with subsequent second drug.

|                                             | IFX               | VDZ              | All               | p-value |
|---------------------------------------------|-------------------|------------------|-------------------|---------|
| N (%)                                       | 8 (28.5)          | 20 (71.4)        | 28 (100)          |         |
| Male (%)                                    | 6 (75)            | 10 (50)          | 16 (57.1)         | 0.401   |
| Extensive Colitis (%)                       | 4 (50)            | 6 (30)           | 10 (35.7)         | 0.400   |
| Left-sided UC (%)                           | 2 (25)            | 14 (70)          | 16 (57.1)         | 0.044   |
| Proctitis(%)                                | 2 (25)            | 0 (0)            | 2 (7.1)           | 0.074   |
| Combination therapy (%)                     | 2 (25)            | 1 (5)            | 3 (10.7)          | 0.188   |
| Age at diagnosis (years, median, IQR)       | 25.5 (18-37)      | 39 (21.5-49)     | 35.5 (20-46)      | 0.101   |
| Age at treatment start (years, median, IQR) | 32.5 (20-46)      | 48.5 (30-59.5)   | 42 (27.57.5)      | 0.108   |
| Disease length (years, median, IQR)         | 4 (0.5-8.5)       | 5 (1.5-11)       | 5 (1-10.5)        | 0.794   |
| Calprotectin (µg/g, median, IQR)            | 3850 (1100-5570)  | 4215 (24-9838)   | 4032 (1100-5570)  | 1       |
| Hemoglobin (Hb) (g/dL, median, IQR)         | 12.8 (10.3-13.8)  | 13 (10.8-14)     | 12.9 (10.8-14)    | 0.710   |
| Platelets (K/micl, median, IQR)             | 238.5 (193-409.5) | 273 (234-398)    | 271 (217.5-409.5) | 0.795   |
| Hematocrit (Hct) (% , median, IQR)          | 40.5 (34-43.7)    | 39.7 (34.7-40.8) | 39.8 (34.6-41.3)  | 0.645   |
| Hb/Hct ratio (median, IQR)                  | 0.3 (0.3-0.3)     | 0.3 (0.3-0.3)    | 0.3 (0.3-0.3)     | 0.014   |
| Eosinophils (K/micl, median, IQR)           | 0.2 (0.1-0.5)     | 0.2 (0.1-.3)     | 0.2 (0.1-0.3)     | 0.353   |
| Neutrophils (K/micl, median, IQR)           | 6.15 (5-6.9)      | 5.5 (3.9-7.7)    | 5.7 (4-7.3)       | 0.917   |

|                                              |                |                |               |       |
|----------------------------------------------|----------------|----------------|---------------|-------|
| Lymphocytes (K/micl, median, IQR)            | 2.5 (2.3-4.1)  | 2 (1.6-2.4)    | 2.3 (1.6-2.5) | 0.037 |
| Neutrophil-to-lymphocyte ratio (median, IQR) | 2.2 ((1.5-2.5) | 2.8 (2.1-4.3)  | 2.4 (1.8-3.5) | 0.088 |
| Leukocytes (K/micl, median, IQR)             | 10 (8.1-12.6)  | 8.3 (7.1-10.2) | 9 (7.2-11.1)  | 0.281 |
| Albumin (g/dL, median, IQR)                  | 4.1 (3.6-4.5)  | 4.1 (4-4.4)    | 4.1 (3.9-4.4) | 0.912 |
| Creatinine (mg/dL, median, IQR)              | 0.9 (0.8-1)    | 0.7 (0.6-0.8)  | 0.7 (0.6-0.9) | 0.265 |
| CRP (mg/dL, median, IQR)                     | 0.3 (0.1-1.1)  | 0.5 (0.2-1.9)  | 0.5 (0.2-1.8) | 0.263 |
| CPK (U/L, median, IQR)                       | 95 (75-115)    | 53 (41-69)     | 55 (42-75)    | 0.527 |
| Phosphorus (mg/dL, median, IQR)              | 3.6 (3.1-4.1)  | 3.7 (3.3-3.9)  | 3.7 (3.3-3.9) | 0.601 |
| Total protein (g/dL, median, IQR)            | 7.3 (6.4-7.8)  | 7.3 (6.7-7.8)  | 7.3 (6.7-7.8) | 0.502 |

UC – Ulcerative colitis, IQR – interquartile range, CRP – C-reactive protein, CPK – creatine phosphokinase.

**Table S2.** Parameters associated with DS of subsequent treatment.

| Parameter                      |                    | HR (95% CI)    | p-value | Adjusted* HR (95% CI) | Adjusted* p-value |
|--------------------------------|--------------------|----------------|---------|-----------------------|-------------------|
| Drug - VDZ                     |                    | 0.3 (0.1-1.3)  | 0.145   | 0.0 (0.0-14.7)        | 0.316             |
| Male                           |                    | 1.6 (0.4-5.4)  | 0.410   | 446.4 (5.3-36943)     | 0.006             |
| Disease extent                 | Extensive colitis  | 1.4 (0.4-4.5)  | 0.533   | --                    | --                |
|                                | Left sided colitis | 0.69 (0.2-2.1) | 0.527   | --                    | --                |
|                                | Proctitis          | 1.6 (0.2-10.2) | 0.579   | --                    | --                |
| Combination therapy            |                    | 0.8 (0.1-5.1)  | 0.865   | 0.0 (0.0-0.0)         | 0.0053            |
| Age at diagnosis               |                    | 0.9 (0.9-0.9)  | 0.032   | --                    | --                |
| Age at treatment start         |                    | 0.9 (0.9-1)    | 0.064   | 0.8 (0.7-0.9)         | 0.026             |
| Length of diagnosis            |                    | 1 (0.9-1.1)    | 0.750   | --                    | --                |
| Calprotectin                   |                    | 1 (0.0-2.3E)   | 0.999   | --                    | --                |
| Hemoglobin(Hb)                 |                    | 0.7 (0.5-1)    | 0.072   | 0.26 (0.0-9.6)        | 0.465             |
| Hematocrit (Hct)               |                    | 0.9 (0.8-1)    | 0.261   | 0.9 (0.2-4)           | 0.944             |
| Hb/Hct ratio                   |                    | 0.0 (0.0-0.9)  | 0.000   | --                    | --                |
| Platelets                      |                    | 1 (1-1)        | 0.059   | --                    | --                |
| Leukocytes                     |                    | 1.1 (1-1.3)    | 0.035   | --                    | --                |
| Eosinophils                    |                    | 1.4 (0.0-30)   | 0.792   | 0.0 (0.0-0.0)         | 0.001             |
| Neutrophils                    |                    | 1.1 (0.9-1.3)  | 0.087   | --                    | --                |
| Lymphocytes                    |                    | 1.9 (0.9-3.7)  | 0.0502  | --                    | --                |
| Neutrophil-to-lymphocyte ratio |                    | 1.1 (0.7-1.6)  | 0.549   | 3.5 (0.6-19.8)        | 0.148             |
| Albumin                        |                    | 0.4 (0.1-1.8)  | 0.265   | 0.0 (0.0-0.3)         | 0.025             |
| Creatinine                     |                    | 0.6 (0.0-9.3)  | 0.778   | --                    | --                |
| CRP                            |                    | 0.9 (0.6-1.2)  | 0.618   | 0.1 (0.0-1.7)         | 0.138             |
| CPK                            |                    | 1 90.9-1)      | 0.303   | --                    | --                |
| Phosphorus                     |                    | 4.5 (1.4-14.5) | 0.011   | --                    | --                |
| Total protein                  |                    | 1.7 (0.5-5.5)  | 0.328   | 1207.9 (6.4-22E)      | 0.007             |

\*Adjustment for factors affecting disease severity, including hemoglobin, hematocrit, neutrophil-to-lymphocyte ratio, albumin, CRP, total protein, age and combination therapy with an immunomodulator. UC – Ulcerative colitis, IQR – interquartile range, CRP – C-reactive protein, CPK – creatine phosphokinase.

**Table S3.** Baseline differences between patients with long-term follow-up.

| Parameter                                                   | Infliximab       | Vedolizumab      | ALL              | p-value |
|-------------------------------------------------------------|------------------|------------------|------------------|---------|
| N (%)                                                       | 49 (100)         | 33 (100)         | 82 (100)         |         |
| Male (%)                                                    | 31 (63.2)        | 17 (51.5)        | 48 (58.5)        | 0.362   |
| Combination therapy (%)                                     | 6 (12.2)         | 1 (3)            | 7 (8.5)          | 0.233   |
| Disease extent                                              |                  |                  |                  | 0.208   |
| Extensive colitis (%)                                       | 14 (28.5)        | 9 (27.2)         | 23 (28)          | 1       |
| Left-sided UC (%)                                           | 29 (59.1)        | 15 (45.4)        | 44 (53.6)        | 0.263   |
| Proctitis (%)                                               | 6 (12.2)         | 9 (27.2)         | 15 (18.2)        | 0.143   |
| Age at diagnosis (years, median, IQR)                       | 36 (22-49)       | 31 (20-54)       | 35.5 (21-51)     | 0.990   |
| Age at treatment start (years, median, IQR)                 | 43 (26-56)       | 45 (28-59)       | 44 (26-57)       | 0.543   |
| Length of diagnosis at treatment start (years, median, IQR) | 2 (1-5)          | 4 (1-11)         | 2 (1-10)         | 0.212   |
| Calprotectin (median, IQR)                                  | 5714 (1114-7011) | 575 (255-1197)   | 1114 (378-5714)  | 0.111   |
| Hemoglobin (median, IQR)                                    | 11.3 (10.4-13.2) | 12.9 (11.6-13.9) | 12.4 (10.8-13.5) | 0.001   |
| Platelets (median, IQR)                                     | 309 (260-393)    | 269 (208-339)    | 301 (231-376)    | 0.05    |
| Hematocrit (median, IQR)                                    | 35 (32-39.9)     | 39 (36.4-42.7)   | 37.8 (33.5-42.3) | <.001   |
| Hb/Hct ratio (median, IQR)                                  | 0.3 (0.3-0.3)    | 0.3 (0.3-0.3)    | 0.3 (0.3-0.3)    | 0.701   |
| Eosinophils (median, IQR)                                   | 0.1 (0.0-0.2)    | 0.3 (0.1-0.4)    | 0.2 (0.1-0.3)    | 0.001   |
| Neutrophils (median)                                        | 6 (4.5-8.4)      | 4.8 (4-6.2)      | 5.6 (4.2-7.8)    | 0.434   |
| Lymphocytes (median, IQR)                                   | 1.3 (1-2)        | 2 (1.3-2.4)      | 1.6 (1.1-4)      | 0.069   |
| Neutrophil-to-lymphocyte ratio (median, IQR)                | 4.3 (2.7-5.7)    | 2.4 (2-3.1)      | 3.3 (2.2-5.5)    | 0.233   |
| Leukocytes (median, IQR)                                    | 8.9 (7.1-10.8)   | 7.9 (6.5-9.7)    | 8.4 (6.5-10.3)   | 0.629   |
| Albumin (median, IQR)                                       | 4 (3.1-4.2)      | 4.4 (4-4.5)      | 4.1 (3.4-4.5)    | <.001   |
| Creatinine (median, IQR)                                    | 0.7 (0.6-0.9)    | 0.8 (0.6-0.9)    | 0.7 (0.6-0.9)    | 0.127   |
| CRP (median, IQR)                                           | 1.6 (0.4-3.7)    | 0.4 (0.2-0.9)    | 0.7 (0.2-2.2)    | 0.013   |
| CPK (median, IQR)                                           | 48 (30-94)       | 54 (38-69)       | 51 (34-85)       | 0.965   |
| Phosphorus (median, IQR)                                    | 3.4 (3-3.8)      | 3.4 (2.9-3.8)    | 3.4 (3-3.8)      | 0.717   |
| Total protein (median, IQR)                                 | 6.6 (5.6-8.1)    | 7.2 (6.9-7.7)    | 7 (6.4-7.5)      | 0.000   |

**Table S4.** Association between different parameters and long term (>156 weeks) sustainability.

| parameter                           | Odds Ratio (CI 95%) | p-value (Chi-Sq) | Adjusted odds ratio (CI 95%) | Adjusted p-value |
|-------------------------------------|---------------------|------------------|------------------------------|------------------|
| Vedolizumab vs Infliximab           | 18.1 (4.3-75.4)     | <.000            | 67 (6-741.9)                 | 0.000            |
| Gender (male)                       | 0.84 (0.3-2.0)      | 0.708            | 1.1 (0.2-5.4)                | 0.862            |
| Left sided UC vs. Extensive colitis | 1.2 (0.4-3.3)       | 0.700            | --                           | --               |
| Proctitis vs. Extensive colitis     | 1.9 (0.4-8.0)       | 0.334            | --                           | --               |
| Combination therapy                 | 0.4 (0.0-2.1)       | 0.305            | 0.6 (0.0-4.7)                | 0.661            |
| Age at diagnosis                    | 0.9 (0.9-1)         | 0.785            | --                           | --               |
| Age at treatment start              | 0.9 (0.9-1)         | 0.916            | 0.9 (0.9-1)                  | 0.627            |
| Length of disease (years)           | 1 (0.9-1)           | 0.845            | --                           | --               |
| Calprotectin                        | 1 (0.9-1)           | 1                | --                           | --               |
| Hemoglobin                          | 1.1 (0.93-1.4)      | 0.167            | 1.5 (0.3-6.3)                | 0.568            |
| Platelets                           | 0.9 (0.9-1)         | 0.098            | --                           | --               |
| Hematocrit                          | 1 (0.9-1.1)         | 0.168            | 0.7 (0.4-1.3)                | 0.367            |
| Hb/Hc ratio                         | 999.9 (0.0-999.9)   | 0.612            | --                           | --               |
| Eosinophils absolute number         | 6 (0.4-88.6)        | 0.191            | 0.3(0.0-43.7)                | 0.669            |
| Neutrophils absolute number         | 0.9 (0.7-1)         | 0.211            | --                           | --               |
| Lymphocytes absolute number         | 0.9 (0.5-1.6)       | 0.935            | --                           | --               |
| Neutrophil-to-lymphocyte ratio      | 1 (0.9-1)           | 0.999            | 1 (0.9-1.2)                  | 0.338            |
| White blood count                   | 0.9 (0.7-1)         | 0.190            | --                           | --               |
| Albumin                             | 2.1 (1-4.2)         | 0.030            | 6.9 (0.4-116.9)              | 0.180            |
| Creatinine                          | 1.4 (0.3-5.3)       | 0.576            | --                           | --               |
| CRP                                 | 0.9 (0.8-1)         | 0.492            | 1 (0.8-1.2)                  | 0.891            |
| CPK                                 | 0.9 (0.9-1)         | 0.305            | --                           | --               |
| Phosphorus                          | 0.4 (0.2-1)         | 0.055            | --                           | --               |
| Total protein                       | 1.5 (0.9-2.4)       | 0.088            | 0.4 (0.0-1.9)                | 0.267            |
